1 **More than just a ticket canceller: The mitochondrial processing peptidase matures complex**  
2 **precursor proteins at internal cleavage sites**

3

4 Jana Friedl<sup>1</sup>, Michael R. Knopp<sup>2</sup>, Carina Groh<sup>1</sup>, Eyal Paz<sup>3</sup>, Sven B. Gould<sup>2</sup>, Felix Boos<sup>1#</sup>,  
5 Johannes M. Herrmann<sup>1</sup>

6

7 <sup>1</sup>Cell Biology, Technische Universität Kaiserslautern, 67663 Kaiserslautern, Germany

8 <sup>2</sup>Molecular Evolution, Heinrich-Heine-Universität Düsseldorf, 40225 Düsseldorf, Germany

9 <sup>3</sup>Departments of Biochemistry and Molecular Biology, Tel Aviv University, Tel Aviv 6997801, Israel

10

11 #, corresponding author, [fboos@rhrk.uni-kl.de](mailto:fboos@rhrk.uni-kl.de)

12

13

14 **Abstract**

15 Most mitochondrial proteins are synthesized in the cytosol as precursors that carry N-terminal  
16 presequences. After import into mitochondria, these targeting signals are cleaved off by the  
17 mitochondrial processing peptidase MPP, giving rise to shorter mature proteins. Using the  
18 mitochondrial tandem protein Arg5,6 as a model substrate, we demonstrate that MPP has an  
19 additional role in preprotein maturation, beyond the removal of presequences. Arg5,6 is synthesized  
20 as a polyprotein precursor that is imported into the mitochondrial matrix and subsequently separated  
21 into two distinct enzymes that function in arginine biogenesis. This internal processing is performed  
22 by MPP, which cleaves the Arg5,6 precursor both at its N-terminus and at an internal site between  
23 the Arg5 and Arg6 parts. The peculiar organization and biogenesis of Arg5,6 is conserved across  
24 fungi and might preserve the mode of co-translational subunit association of the arginine biosynthesis  
25 complex of the polycistronic arginine operon in prokaryotic mitochondrial ancestors. Putative MPP  
26 cleavage sites are also present at the junctions in other mitochondrial fusion proteins from fungi,  
27 plants and animals. Our data suggest that, in addition to its role as “ticket canceller” for the removal  
28 of presequences, MPP exhibits a second, widely conserved activity as internal processing peptidase  
29 for complex mitochondrial precursor proteins.

30

31

## 32 **Introduction**

33 All cellular processes are carried out by proteins, linear chains of amino acids that fold into three-  
34 dimensional structures. While the amino acid sequence of a protein is primarily determined by its  
35 DNA sequence, many proteins are additionally modified by proteolytic cleavage after their synthesis.  
36 Processing of polypeptides at their N-terminus is pervasive in both prokaryotic and eukaryotic  
37 proteomes. For instance, the amino-terminal methionine is removed from many polypeptides when  
38 they emerge from the ribosome and the new N-terminus is a crucial determinant of protein stability  
39 (Bradshaw et al., 1998, Varshavsky, 2011, Frottin et al., 2006). The majority of intracellular protein  
40 targeting signals are located at the N-terminus and cleaved off upon arrival at the correct cellular  
41 destination. For example, around two thirds of the nuclear-encoded mitochondrial proteins are  
42 synthesized as precursors that carry an N-terminal mitochondrial targeting sequence (MTS) or  
43 presequence which directs them to mitochondrial surface receptors (Bykov et al., 2020, Becker et al.,  
44 2019, von Heijne, 1986). These preproteins are imported into mitochondria via the translocases of  
45 the outer (TOM complex) and inner mitochondrial membrane (TIM23 complex) (Pfanner et al., 2019,  
46 Chacinska et al., 2009). Their MTS is cleaved by the mitochondrial processing peptidase (MPP). In  
47 some cases, the thereby generated new N-terminus of the polypeptide is further shortened by cleavage  
48 of single amino acids or short peptides by the proteases Icp55 or Oct1 before the matured protein  
49 folds into its native structure (Poveda-Huertes et al., 2017, Vögtle et al., 2011, Vögtle et al., 2009,  
50 Calvo et al., 2017, Naamati et al., 2009). Correct processing of precursor proteins in the matrix is  
51 crucial to maintain mitochondrial function and proteostasis. Dysfunctional preprotein maturation in  
52 mitochondria was observed in models of Alzheimer's disease (Mossmann et al., 2014). It results in  
53 proteome instability, aggregation of incorrectly processed precursors and proteotoxic stress (Poveda-  
54 Huertes et al., 2020).

55 Internal cleavage of polypeptides is less frequent than processing from the N-terminus, but equally  
56 relevant for cellular physiology and organismal health. Examples of medically relevant polypeptides  
57 that undergo internal proteolytic processing during their biosynthesis include insulin or amyloid

58 precursor protein (APP) (Steiner and Oyer, 1967, Müller et al., 2017). In most cases, peptides are  
59 removed to yield the mature form of a single protein. However, some genes encode fusion proteins  
60 that are synthesized as a single precursor and are then separated into distinct, functional proteins by  
61 proteolytic cleavage. A prominent example is ubiquitin, which is encoded as a fusion with subunits  
62 of the ribosome or as head-to-tail repeats of several ubiquitin monomers which are rapidly separated  
63 by deubiquitinating proteases (Finley et al., 1989, Ozkaynak et al., 1984, Gemayel et al., 2017).  
64 Polyproteins also frequently occur in viral genomes, including HIV and SARS-CoV-2, where the  
65 cleavage products often form protein complexes (Yost and Marcotrigiano, 2013, Zhang et al., 2020,  
66 Krichel et al., 2020). In eukaryotic genomes, such an organization is rare, despite its obvious  
67 advantage of stoichiometric co-expression of functionally related proteins.

68 Here we report about a notable exception: The *ARG5,6* gene of *Saccharomyces cerevisiae* encodes  
69 both the acetylglutamate kinase (Arg6) and the acetylglutamyl-phosphate reductase (Arg5), two  
70 enzymes that catalyze the second and third step of arginine biosynthesis in the mitochondrial matrix  
71 (Minet et al., 1979). These two enzymes are synthesized as a single precursor protein that is post-  
72 translationally cleaved into separate polypeptides. Arg6 and Arg5 then form a complex together with  
73 the acetylglutamate synthase Arg2 (Pauwels et al., 2003, Abadjieva et al., 2001). Here, we investigate  
74 the biogenesis of Arg5,6 in more detail and identify MPP as the protease that is responsible for  
75 processing of the precursor into two functional enzymes. We demonstrate that Arg6 and Arg5 can be  
76 imported into mitochondria separately, where they still form a functional enzyme. However, its  
77 organization as a composite precursor that is matured by MPP is highly conserved across fungi. These  
78 findings broaden our view on MPP as processing peptidase of more general role in mitochondrial  
79 preprotein maturation, reaching beyond its canonical function of removing mitochondrial targeting  
80 signals.

## 81 **Results**

### 82 **Arg5,6 is processed by MPP in the mitochondrial matrix**

83 The acetylglutamate kinase (Arg6) and acetylglutamyl-phosphate reductase (Arg5) are located in the  
84 mitochondrial matrix, where they catalyze the second and third step of the biosynthesis of arginine  
85 from glutamate (Fig. 1A) (Minet et al., 1979, Morgenstern et al., 2017). The composite precursor  
86 protein that is synthesized from the *ARG5,6* gene contains a mitochondrial targeting sequence (MTS)  
87 (Vögtle et al., 2009), which was suggested to direct the single precursor into mitochondria where it  
88 is subsequently cleaved into two separate polypeptides (Boonchird et al., 1991b). Indeed, when we  
89 expressed Arg5,6 with a C-terminal hemagglutinin (HA) tag, immunoblotting of cell lysates against  
90 the HA epitope revealed only a single band at around 40 kDa, much less than the expected mass of  
91 90 kDa of the composite precursor protein (Fig. 1B). Obviously, the precursor is rapidly and  
92 efficiently cleaved *in vivo*, which yields a C-terminal Arg5 fragment.

93 In order to analyze the mechanistic basis of this unusual biogenesis, we sought to reconstitute the  
94 biogenesis and processing of Arg5,6 in an *in vitro* system. To this end, we synthesized radiolabeled  
95 Arg5,6 precursor in reticulocyte lysate and incubated it with isolated yeast mitochondria. We  
96 observed that the precursor of around 90 kDa was efficiently processed to a slightly smaller  
97 intermediate form – indicating the removal of the N-terminal MTS – and further into several smaller  
98 fragments, most prominently two polypeptides of around 40 and 50 kDa, which correspond to the C-  
99 terminal Arg5 and the N-terminal Arg6, respectively (Fig. 1C). The intermediate as well as the mature  
100 polypeptides, but not the Arg5,6 precursor were protected from digestion with externally added  
101 proteinase K. This shows that these polypeptides were translocated across the mitochondrial outer  
102 membrane. Both import and processing were dependent on the mitochondrial inner membrane  
103 potential ( $\Delta\psi$ ) as expected for an MTS-containing matrix protein (Sato et al., 2019, Schendzielorz et  
104 al., 2017, Garg and Gould, 2016). We conclude that Arg5,6 is imported into the mitochondrial matrix  
105 via the presequence pathway and cleaved into separate polypeptides inside mitochondria.

106 How is the Arg5,6 precursor processed to give rise to the Arg6 and Arg5 enzymes? A number of  
107 proteases in the mitochondrial matrix are described (Quiros et al., 2015, Veling et al., 2017).  
108 However, most of them are either implicated in degradation and turnover of proteins (such as the Lon  
109 protease Pim1) or known to remove short peptides or single amino acids from the N-terminus of  
110 mitochondrial precursor proteins (such as Oct1 or Icp55), but not for internal cleavage of proteins  
111 into two mature parts (Vögtle et al., 2009, Poveda-Huertes et al., 2017, Vögtle et al., 2011, Wagner  
112 et al., 1994, Suzuki et al., 1994). For MPP, the peptidase responsible for the cleavage of the N-  
113 terminal MTS, a notable exception was recently reported: The composite precursor protein Atp25  
114 contains internal MPP cleavage sites at which the protein is split into two functionally unrelated  
115 polypeptides (Woellhaf et al., 2016). In Atp25, the internal MPP cleavage sites coincide with a  
116 sequence stretch that structurally mimics the properties of an N-terminal MTS. We asked whether  
117 MPP might also be involved in the processing of Arg5,6 and subjected its amino acid sequence to an  
118 *in silico* prediction of such internal MTS-like sequences (iMTS-Ls) using an adapted version of the  
119 TargetP algorithm (Boos et al., 2018, Emanuelsson et al., 2007). In fact, in addition to the N-terminal  
120 MTS, two internal regions with high TargetP score were detected around amino acid positions 344  
121 and 503 (Fig. 1D). The latter one would fit to the molecular masses of the Arg6 and Arg5 proteins  
122 observed in our *in vitro* system. To directly test whether MPP can cleave the Arg5,6 precursor, we  
123 purified MPP from *E. coli* expressing His-tagged Mas1 and Mas2 (the two subunits of MPP).  
124 Incubation of radiolabeled Arg5,6 precursor protein with MPP resulted in the formation of smaller  
125 fragments whose size perfectly matched those that were generated after import into isolated  
126 mitochondria (Fig. 1E). Proper processing was blocked when EDTA was added to the reaction, which  
127 inhibits the metalloprotease MPP by chelating divalent cations (Suppl. Fig. 1A) (Luciano et al., 1998).  
128 We conclude that Arg5,6 is imported into the mitochondrial matrix and processed twice by MPP. A  
129 first cleavage removes the N-terminal MTS and a second cleavage at an iMTS-L separates the Arg6  
130 and Arg5 enzymes (Fig. 1F).

132 **Arg5 and Arg6 can be imported into mitochondria separately and complement the *arg5,6***  
133 **deletion mutant**

134 The unusual biogenesis of Arg5,6 prompted us to ask whether Arg6 and Arg5 can also be imported  
135 separately. Therefore, we created truncated versions of the *ARG5,6* gene which contain only the  
136 N-terminal Arg6 with its MTS (Arg6<sup>1-502</sup>) or only the C-terminal Arg5, starting at the first  
137 (Arg5<sup>344-863</sup>) or the second iMTS-L (Arg5<sup>503-863</sup>). For the latter two, we also generated variants which  
138 additionally carry the well-characterized presequence of ATP synthase subunit 9 from *Neurospora*  
139 *crassa* (Su9-Arg5<sup>344-863</sup> and Su9-Arg5<sup>503-863</sup>) (Fig. 2A).

140 Radiolabeled proteins were synthesized *in vitro* and incubated with isolated mitochondria to test their  
141 import competence. As expected, Arg6<sup>1-502</sup> was efficiently imported and its MTS was cleaved  
142 (Fig. 2B). The shorter Arg5 variant (Arg5<sup>503-863</sup>) did not reach a protease-protected compartment and,  
143 thus, was not imported into mitochondria (Fig. 2C). However, N-terminal fusion of the Su9  
144 presequence completely restored import of Arg5<sup>503-863</sup> (Fig. 2D). Hence, import of Arg5 and Arg6  
145 into mitochondria is in principle possible also for separated polypeptides, at least in the *in vitro* assay  
146 used here.

147 We next tested whether Arg6 and Arg5 can be imported separately *in vivo* and function in arginine  
148 biosynthesis. The deletion of the *ARG5,6* gene renders yeast cells auxotrophic for arginine. We  
149 expressed either the full length Arg5,6 precursor or combinations of separate Arg6 and Arg5 variants  
150 in a  $\Delta arg5,6$  deletion mutant. If Arg6 and Arg5 make their way into mitochondria and acquire a  
151 functional conformation, arginine prototrophy should be restored. When we streaked out these cells  
152 on plates with minimal growth medium lacking arginine, we observed growth for the wildtype and  
153 the  $\Delta arg5,6$  mutant complemented with full length Arg5,6, but not for  $\Delta arg5,6$  carrying only an  
154 empty plasmid, as expected (Fig. 2E).

155 The mutant expressing both Arg6<sup>1-502</sup> and the shorter Arg5<sup>503-863</sup> variant was not able to grow without  
156 arginine (Fig. 2E). However, when the presequence of Su9 was fused to the short Arg5<sup>503-863</sup>, cells

157 regained arginine prototrophy (Fig. 2F). All strains grew on plates containing arginine, showing that  
158 the Arg5<sup>503-863</sup> protein has no toxic gain-of-function effect when residing in the cytosol (Suppl. Fig.  
159 1B,C). Growing the strains in liquid medium lacking arginine confirmed the results obtained on plates  
160 and additionally demonstrated that the growth rate of the strain expressing Arg6<sup>1-502</sup> and Su9-  
161 Arg5<sup>503-863</sup> is comparable to that of the wildtype (Suppl. Fig. 1D), at least under the overexpression  
162 conditions used here. This indicates that separate expression of Arg6 and Arg5 is, in principle,  
163 possible without adverse effects on cellular fitness.

164 A truncated version of Arg6 (Arg6<sup>1-343</sup>) did not complement the deletion mutant with any of the Arg5  
165 variants, even though this variant contains the entire region of homology to the bacterial  
166 acetylglutamate kinase argB from *E. coli* (Fig. 2F). Apparently, the amino acids 344 to 502 are  
167 functionally relevant for enzyme activity and not merely a spacer or linker between Arg5 and Arg6.  
168 Taken together, both Arg6 and Arg5 can be imported separately into mitochondria *in vitro* and *in vivo*  
169 and are functional in arginine biosynthesis, as long as mitochondrial localization is conferred by  
170 appropriate N-terminal targeting signals.

171

## 172 **Internal processing of Arg5,6 by MPP requires an N-terminal presequence**

173 Surprisingly, cells expressing Arg6<sup>1-502</sup> and the longer Arg5<sup>344-863</sup> could grow without arginine,  
174 indicating that this longer Arg5 variant can be imported even without fusion of an additional  
175 presequence (Fig. 2E). Indeed, Arg5<sup>344-863</sup> was imported into isolated mitochondria, albeit with low  
176 efficiency (Fig. 3A). Addition of proteinase K to this import reaction resulted in the appearance of  
177 lower-running bands that were absent without protease, indicating that a portion of the precursor  
178 translocated only partially across the outer membrane. This is in agreement with earlier observations  
179 that iMTS-Ls can confer targeting to mitochondria when presented at the N-terminus, but are not  
180 necessarily able to drive complete translocation (Backes et al., 2018, Baker and Schatz, 1987). As



181 expected, fusion of the Su9 presequence to Arg5<sup>344-863</sup> resulted in more efficient translocation  
182 (Fig. 3B).

183 Interestingly, even the fully imported Arg5<sup>344-863</sup> was not processed inside mitochondria, while for  
184 Su9-Arg5<sup>344-863</sup>, prominent lower-running bands were observed. Their sizes fit those expected for the  
185 intermediate form after removal of the Su9 presequence (around 60 kDa), the completely matured  
186 Arg5 after cleavage at the second MPP site (around 40 kDa) and the cleaved “linker” between the  
187 Su9 presequence and Arg5 (around 25 kDa). This suggests that an internal MPP cleavage at an  
188 iMTS-L requires a *bona fide* N-terminal MTS.

189 To test whether this holds true also *in vivo*, we expressed HA-tagged Arg5,6 as well as Arg5 variants  
190 in yeast cells and analyzed cell lysates by immunoblotting against the HA epitope. In agreement with  
191 the *in vitro* import experiments, both Su9-Arg5<sup>344-863</sup> and Su9-Arg5<sup>503-863</sup> were processed and yielded  
192 a band at the same molecular weight as full length Arg5,6. In contrast, Arg5<sup>344-863</sup> and Arg5<sup>503-863</sup>  
193 were exclusively present in their unprocessed forms (Fig. 3C). Hence, even though Arg5<sup>344-863</sup> is  
194 imported into mitochondria, its iMTS-L is not recognized by MPP. Obviously, internal MPP cleavage  
195 sites are dependent not only on the presence of a particular motif and its immediate context within  
196 the amino acid sequence, but also on more distant features of the polypeptide, such as the N-terminal  
197 presequence (Fig. 3D).

198

199 **The ARG5,6 genes are fused in fungi, separated in algae, and encoded polycistronically in**  
200 **gamma-proteobacteria**

201 Tandem organization of functionally related genes is rare in eukaryotes. In contrast, genomic co-  
202 localization of functionally related genes is pervasive in prokaryotes. The *E. coli* proteins argB and  
203 argC are homologous to Arg6 and Arg5, respectively, and are organized in an operon, i.e. they are  
204 transcribed polycistronically (Piette et al., 1982). We used the sequences of argB and argC of *E. coli*  
205 *K-12* as query sequences to search a prokaryotic database of 5,655 organisms (Suppl. Table 1A).

206 3,666 species were identified that encode exactly one copy each of *argB* and *argC* (Suppl. Table 1B),  
207 mainly distributed among Proteobacteria, Firmicutes, Actinobacteria and Cyanobacteria. Among the  
208 3,666 prokaryotes, 882 strains (848 of which were gamma-proteobacteria) encode the two open  
209 reading frames in immediate proximity, and hence presumably express them on a polycistronic  
210 mRNA, (Suppl. Table 1C).

211 Even though we cannot directly trace back the evolutionary history of Arg5,6 of *Saccharomyces*  
212 *cerevisiae*, these findings support the idea that this eukaryotic two-gene cluster evolved from syntenic  
213 genes in the eukaryotic ancestor. Nevertheless, Arg5,6 represents an exceptional case. Only very few  
214 proteins with a similar fusion structure are known in baker's yeast, and for none of them do the  
215 separate proteins function in the same pathway (Woellhaf et al., 2016, Finley et al., 1989, Ozkaynak  
216 et al., 1987). However, the Arg5,6 homolog *arg-6* in *Neurospora crassa* also encodes both  
217 acetylglutamate kinase and acetylglutamyl-phosphate reductase which are separated by proteolytic  
218 cleavage inside mitochondria (Parra-Gessert et al., 1998, Gessert et al., 1994). We therefore asked  
219 whether the composite structure of Arg5,6 is generally conserved across eukaryote species. To this  
220 end, we searched a dataset of 150 eukaryotes for homologs of the yeast composite Arg5,6 precursor  
221 and of its post-translationally processed proteins Arg5 and Arg6 (Suppl. Table 1D). While 82  
222 genomes returned no hits, we identified specific patterns within the diamond BLASTp hits of 36  
223 eukaryotes (Fig. 4A, Suppl. Fig. 2, Suppl. Table 1E). In 28 species, all three query sequences hit the  
224 same subject, indicating the presence of an *ARG5,6* gene fusion homolog. With the sole exception of  
225 *Phytophthora sojae*, the fusion homologs were exclusively found among fungi. In eight species, Arg5  
226 and Arg6 each hit a single independent sequence, while Arg5,6 hit both of those sequences, which  
227 indicates that separate genes encode for Arg5 and Arg6. Again with a single exception (*Fusarium*  
228 *graminearum* PH-1), all of these organisms were algae, comprising both green and red algae. In 32  
229 species we identified mixed blast patterns (Suppl. Table 1F) that were not further investigated. We  
230 also predicted the intracellular localization of all proteins via TargetP. Strikingly, mitochondrial

231 localization was assigned to almost all fusion proteins of fungi, whereas most separate proteins in  
232 algae were predicted to be imported into chloroplasts (Fig. 4B).

233 In summary, in fungi the acetylglutamate kinase and acetylglutamyl-phosphate reductase are  
234 generally encoded as a fusion protein, which is imported into mitochondria and processed twice by  
235 MPP to remove its presequence and gives rise to two functional enzymes. In contrast, algae encode  
236 two separate proteins which are individually imported into chloroplasts. Gamma-proteobacteria  
237 express the genes from one polycistronic RNA (Fig. 4C).

238

### 239 **Internal precursor processing by MPP is conserved among eukaryotes**

240 Since mitochondrial localization correlates well with the tandem structure of Arg5,6 homologs, we  
241 wondered whether the intramitochondrial processing into two separate enzymes by MPP might also  
242 be conserved in these species. To address this, we calculated the iMTS-L profiles of all fusion  
243 homologs of Arg5,6. In fact, we observed a common pattern across nearly all species: Besides the  
244 N-terminal MTS, our algorithm detected one conserved iMTS-L around amino acid position 500  
245 (Fig. 5A). Hence, all these fusion proteins harbor a potential MPP cleavage site precisely at the  
246 junction between the Arg5 and Arg6 parts.

247 This remarkable conservation of protein structure and processing inspired us to ask whether MPP  
248 could be responsible for internal cleavage of other mitochondrial proteins. Apart from Arg5,6 and its  
249 homologs, some other mitochondrial proteins with composite structure have been described in  
250 different species. These include proteins from different fungi (Atp25 from *S. cerevisiae* and  
251 *E. nidulans* and Etp1, Rsm22-Cox11 and the uncharacterized SPAC22A12.08c from *S. pombe*) and  
252 plants (RPS14 from *O. sativa subsp. japonica*) (Oshima et al., 2005, Woellhaf et al., 2016,  
253 Khalimonchuk et al., 2006). We subjected these mitochondrial fusion proteins to our iMTS-L  
254 profiling analysis and indeed found prominent iMTS-Ls at each of their junction sites (Fig. 5B).

255

## 256 **Discussion**

257 The organization as fusion protein is an elegant solution to confer mitochondrial targeting of two  
258 enzymes that reside in the same compartment and even act in subsequent steps of a biochemical  
259 pathway. It is still remarkable that this organization of Arg5,6 was retained during evolution even in  
260 distantly related organisms, indicating that there exists a strong constraint that maintained this  
261 organization for more than a billion years of evolution. To our knowledge, this is the only example  
262 of a fusion of two functionally related proteins whose organization is so widely conserved across  
263 eukaryote species. Eukaryotic genomes typically strongly disfavor even “milder” variants of physical  
264 coupling of genes, such as an operon-like organization which is pervasively present in prokaryotes,  
265 but basically absent in most eukaryotes. Interestingly, also events of horizontal gene transfer from  
266 bacteria to eukaryotes were accompanied by progressive loss of the polycistronic organization of the  
267 genes (Kominek et al., 2019). What might be the reason that the peculiar tandem structure of Arg5,6  
268 survived several million years of evolution?

269 Since Arg6 and Arg5 form a complex, it is conceivable that the tandem structure of the precursor  
270 might facilitate their assembly. Many cytosolic protein complexes assemble cotranslationally, and  
271 this early-onset interaction between the partner subunits is crucial for function and, more generally,  
272 for maintenance of proteostasis (Shiber et al., 2018, Schwarz and Beck, 2019). Cotranslational  
273 assembly of nuclear encoded mitochondrial proteins is hindered by the additional translocation step  
274 across two mitochondrial membranes. Therefore, coupling the assembly with the import of proteins  
275 into the mitochondrial matrix might represent the closest approximation to cotranslational assembly  
276 that is physically possible.

277 Besides its canonical role as “ticket canceller” that clips targeting signals, the mitochondrial  
278 processing peptidase MPP obviously also possesses a “tailor” activity for internal processing of  
279 several precursor proteins (Fig. 5C). This property is conserved across the fungi, plant and potentially  
280 also animal kingdoms. Internal MPP cleavage requires a proximal recognition motif which appears  
281 to be an iMTS-L, but remarkably also a strong N-terminal presequence. This suggests that in order to

282 access internal cleavage sites, MPP has to be loaded onto a precursor as soon as it emerges from the  
283 TIM23 channel. MPP might then “scan” the still unfolded polypeptide for cleavage sites. A protein  
284 with a strong presequence will efficiently recruit MPP, which enables subsequent internal cleavage  
285 at an iMTS-L before this is buried by protein folding. In analyses of the N-proteome from yeast,  
286 mouse and human mitochondria, a surprising variability in the N-termini of many proteins were  
287 observed, sometimes more than 100 amino acids downstream of the annotated start (Calvo et al.,  
288 2017, Vögtle et al., 2009, Vaca Jacome et al., 2015). Some of these isoforms might be generated by  
289 “leaky” internal MPP cleavage. For instance, the mouse protein Sdha has an alternative N-terminus  
290 at position 172 which coincides with an iMTS-L (Fig. 5B). It will be exciting to elucidate the  
291 biogenesis and physiological role of such protein isoforms in future research. Its unusual biogenesis  
292 might render Arg5,6 a valuable model substrate to explore the mechanisms that confer specificity of  
293 internal MPP cleavage.

294

295

296

## 297 **Materials and Methods**

### 298 **Yeast strains and plasmids**

299 All yeast strains used in this study were based on the WT strain BY4742 (Winston et al., 1995).  
300 Unless indicated differently, strains were grown on synthetic medium (0.17% yeast nitrogen base and  
301 0.5% (NH<sub>4</sub>)<sub>2</sub>SO<sub>4</sub>) containing 2% glucose.

302 The Arg5,6-coding region or a fragment of it was amplified by PCR and cloned into pGEM4  
303 (Promega, Madison, WI) using the EcoRI and BamHI restriction sites. For construction of the  
304 Arg5,6-HA, Arg5<sup>344-863</sup>-HA and Arg5<sup>503-863</sup>-HA versions, the corresponding sequence without stop  
305 codon was cloned into the expression plasmid pYX142, which harbors a constitutive *TPI* promoter  
306 upstream and the sequence of a hemagglutinin (HA) tag downstream of the multiple cloning site. For  
307 expression of Arg6<sup>1-343</sup>-HA and Arg6<sup>1-502</sup>-HA, pYX122 vectors were used which differ from pYX142  
308 in the selectable marker. The sequence of the Su9 presequence was amplified from a Su9-DHFR  
309 plasmid and cloned into the EcoRI site of the pYX142 plasmid carrying the *ARG5* inserts to yield the  
310 Su9-Arg5<sup>344-863</sup>-HA and Su9-Arg5<sup>503-863</sup>-HA variants.

### 311 **Isolation of yeast mitochondria**

312 Isolation of mitochondria was performed essentially as described (Saladi et al., 2020). Yeast cells  
313 were grown in YPGal medium (1% yeast extract, 2% peptone, 2% galactose) to an OD<sub>600</sub> of 0.7-1.3,  
314 harvested, washed with water and resuspended in MP1 buffer (10 mM DTT, 100 mM Tris). Cells  
315 were incubated for 10 min at 30°C, pelleted (5 min at 4,000 x g at RT) and washed with 1.2 M sorbitol.  
316 The cell was digested in MP2 buffer (1.2M sorbitol, 20mM KH<sub>2</sub>PO<sub>4</sub> pH 7.4) supplemented with 3mg  
317 zymolyase/g wet weight (Seikagaku Corporation) for 1 h at 30°C. The spheroplasts were harvested,  
318 resuspended in ice-cold homogenization buffer (0.6 M sorbitol, 1 mM EDTA pH 8, 1 mM  
319 phenylmethanesulfonyl fluoride (PMSF), 10 mM Tris-HCl pH 7.4, 0.2% fatty acid-free BSA) and  
320 lysed by douncing 10 times in a cooled potter homogenizer.

321 The homogenate was centrifuged for 5 min at 3,500 x g at 4°C to separate cell debris and nuclei from  
322 organelles. The mitochondrial fraction was isolated by centrifugation of the supernatant from the

323 previous step for 12 min at 12,000 x g at 4°C. The crude mitochondrial pellet was gently resuspended  
324 in SH buffer (0.6M sorbitol, 20mM HEPES/KOH pH 7.4), centrifuged for 5 min at 4,000 x g at 4°C,  
325 recovered from the supernatant by centrifugation for 12 min at 12,000 x g at 4°C and finally  
326 resuspended in SH buffer. The protein concentration of the mitochondrial suspension was determined  
327 by a Bradford assay and mitochondria were diluted to a final concentration of 10 mg/ml protein with  
328 ice-cold SH buffer, aliquoted, frozen in liquid nitrogen and stored at -80°C.

### 329 **Import of radiolabeled proteins into isolated mitochondria**

330 Import reactions were essentially performed as described previously (Peleh et al., 2015) in the  
331 following import buffer: 500 mM sorbitol, 50 mM Hepes, pH 7.4, 80 mM KCl, 10 mM magnesium  
332 acetate, and 2 mM KH<sub>2</sub>PO<sub>4</sub>. Mitochondria were energized by addition of 2 mM ATP and 2 mM  
333 NADH before radiolabeled precursor proteins were added. To dissipate the membrane potential, a  
334 mixture of 1 µg/ml valinomycin, 8.8 µg/ml antimycin, and 17 µg/ml oligomycin was added to the  
335 mitochondria. Precursor proteins were incubated with mitochondria for different times at 25°C before  
336 nonimported protein was degraded by addition of 100 µg/ml proteinase K.

### 337 **Growth Assays**

338 Growth curves were performed automated in a 96 well plate in technical triplicates using the ELx808  
339 Absorbance Microplate Reader (BioTek). Precultures of 100 µl were inoculated at an OD<sub>600</sub> of 0.1 in  
340 microtiter plates and sealed with an air-permeable membrane (Breathe-Easy; Sigma-Aldrich, St.  
341 Louis, MO). The growth curves started at OD<sub>600</sub> 0.1 and incubated at 30°C for 72 h under constant  
342 shaking. The OD<sub>600</sub> was measured every 10 min.

### 343 **Antibodies**

344 The antibody against Sod1 was raised in rabbits using purified recombinant protein. The secondary  
345 antibody was ordered from Biorad (Goat Anti-Rabbit IgG (H+L)-HRP Conjugate #172-1019). The  
346 horseradish peroxidase-coupled HA antibody was ordered from Roche (Anti-HA-Peroxidase, High  
347 Affinity (3F10), #12 013 819 001). Antibodies were diluted in 5% (w/v) nonfat dry milk-TBS (Roth  
348 T145.2) with the following dilutions: Anti-Sod1 1:1,000, Anti-HA 1:500, Anti-Rabbit 1:10,000.



## 349 **MPP purification**

350 The *E. coli* strain expressing histidine-tagged MPP subunits Mas1 and Mas2 from an expression  
351 plasmid was a gift of Vincent Géli (Luciano et al., 1997). The cells were grown at 37°C to an OD<sub>600</sub>  
352 of 1 and induced with 0.5 mM IPTG over night at 30°C. The bacteria were harvested and resuspended  
353 in buffer A (250 mM NaCl, 10 mM imidazole, 2 mM β-mercaptoethanol, 0.2% NP-40, lysozyme),  
354 incubated at room temperature for 15 min and snap-frozen in liquid nitrogen. After thawing, DNaseI  
355 was added and the cells were sonified 20 times for 1 s at 60% duty level with a Branson sonifier 250.  
356 The lysate was cleared by centrifugation, loaded on buffer A-equilibrated Ni-NTA Sepharose resin  
357 (Aminitra; Expedeon, San Diego, CA) and washed with buffer A without detergent. A second wash  
358 was performed with buffer A adjusted to 1 M NaCl. The enzyme was eluted in buffer C (250 mM  
359 NaCl, 300 mM imidazole, 5% glycerol) and stored at -80°C.

## 360 **MPP in vitro cleavage assay**

361 The *in vitro* cleavage reactions were performed in 150 mM NaCl, 10% glycerol, 100 μM MnCl<sub>2</sub>, and  
362 50 mM Tris, pH 7.5, in the presence of 250 μg of purified MPP and 5% reticulocyte lysate containing  
363 the substrate. If not otherwise stated, the incubation time was 1.5 h at 30°C. To inhibit MPP, the same  
364 reaction was performed in the presence of 2.5 mM EDTA and without addition of MnCl<sub>2</sub>.

## 365 **Prediction of iMTS-Ls**

366 iMTS-Ls were predicted essentially as described (Backes et al., 2018, Boos et al., 2018). Briefly,  
367 multiple truncated sequences were generated by sequentially removing amino acids, one by one, N-  
368 terminally from the protein of interest. These sequences were submitted to TargetP with appropriate  
369 choice of “plant” or “non-plant” organism and without cutoffs. The mTP scores obtained were plotted  
370 against the corresponding amino acid position. A Savitzky–Golay filtering step with a window size  
371 of 21 (the expected value of the length distribution of known MTSs) was used to smooth the iMTS-L  
372 profile. The iMTS-L profiles can also be calculated using the iMTS-L predictor service online tool  
373 iMLP (<http://imlp.bio.uni-kl.de/>).

374



375 **Arg5,6 homologs, intracellular localization and genomic distance**

376 Amino acid sequences of yeast Arg5,6 and both post-translationally processed proteins Arg5 and  
377 Arg6 were retrieved from (Boonchird et al., 1991a) and used as query sequences for a Diamond  
378 BLASTp (Buchfink et al., 2015) against a dataset of 150 eukaryotic genomes (Suppl. Table 1D).  
379 Subject organisms that exhibited hits (at least 25% local identity and a maximum E-value of 1E-10)  
380 were grouped by the number and pattern of the identified homologs, corresponding to either encoding  
381 Arg5,6 as one gene or as two genes (Suppl. Table 1E), by a python script. The intracellular  
382 localization of all homologs was checked via TargetP 2.0 (Almagro Armenteros et al., 2019). Results  
383 were plotted on a eukaryotic reference tree generated in a previous analysis (Brueckner and Martin,  
384 2020). For the identification of prokaryotic homologs, argB and argC amino acid sequences of  
385 *Escherichia coli* K-12 were used as queries to search our dataset of 5,655 complete prokaryotic  
386 genomes (Refseq, Suppl. Table 1A) (O'Leary et al., 2016). Query sequences were identified as  
387 homologs to yeast Arg5 and Arg6 via diamond BLASTp. Only prokaryotic subject organisms  
388 exhibiting exactly one homolog to each of the two query sequences (at least 25% local identity and a  
389 maximum E-value of 1E-10) were further investigated and the nucleotide distance between the  
390 subject genes was calculated (Suppl. Table 1C). Sequence pairs with a maximum distance of 30  
391 nucleotides were suspected to be encoded polycistronically. All genomic distances in nucleotides  
392 were derived from Refseq genome feature tables. Sequence pairs with overlapping start and end  
393 position were given a distance of one nucleotide.

394

395

396

397 **Author contributions**

398 F.B. and J.M.H. conceived and supervised the study. J.F. generated constructs and strains and  
399 performed *in vivo* experiments. J.F. and E.P. purified recombinant proteins and performed *in vitro*  
400 MPP digestions. J.F. and C.G. performed *in vitro* import assays. J.F. and F.B. performed *in silico*  
401 prediction of iMTS-Ls. M.R.K. and S.B.G. analyzed the organization of *ARG5,6* homologs in  
402 different species. J.F., J.M.H. and F.B. analyzed the data. F.B. wrote the manuscript to which all  
403 authors contributed.

404

405 **Acknowledgements**

406 We thank Sabine Knaus, Alexander Grevel and Thomas Becker for assistance with the experiments,  
407 and Abdussalam Azem and Katja Hansen for helpful discussions and critical reading of the  
408 manuscript. This project was funded by grants from the Deutsche Forschungsgemeinschaft (DIP  
409 MitoBalance and 2803/10-1 to J.M.H. and 267205415 – SFB 1208 to S.B.G.), the Volkswagen  
410 Stiftung (Life) to S.B.G., the Minerva Stiftung (to J.F.) and the Joachim Herz Stiftung (to F.B.).

411

412 **Competing interests**

413 The authors declare that they have no competing interests.

414

## 415 References

- 416 ABADJIEVA, A., PAUWELS, K., HILVEN, P. & CRABEEL, M. 2001. A new yeast metabolon involving at least the  
417 two first enzymes of arginine biosynthesis: acetylglutamate synthase activity requires complex  
418 formation with acetylglutamate kinase. *J Biol Chem*, 276, 42869-80.
- 419 ALMAGRO ARMENTEROS, J. J., SALVATORE, M., EMANUELSSON, O., WINTHER, O., VON HEIJNE, G.,  
420 ELOFSSON, A. & NIELSEN, H. 2019. Detecting sequence signals in targeting peptides using deep  
421 learning. *Life Sci Alliance*, 2, e201900429.
- 422 BACKES, S., HESS, S., BOOS, F., WOELLHAF, M. W., GODEL, S., JUNG, M., MÜHLHAUS, T. & HERRMANN, J. M.  
423 2018. Tom70 enhances mitochondrial preprotein import efficiency by binding to internal targeting  
424 sequences. *J Cell Biol*, 217, 1369-1382.
- 425 BAKER, A. & SCHATZ, G. 1987. Sequences from a prokaryotic genome or the mouse dihydrofolate reductase  
426 gene can restore the import of a truncated precursor protein into yeast mitochondria. *Proc Natl Acad  
427 Sci U S A*, 84, 3117-21.
- 428 BECKER, T., SONG, J. & PFANNER, N. 2019. Versatility of Preprotein Transfer from the Cytosol to  
429 Mitochondria. *Trends Cell Biol*, 29, 534-548.
- 430 BOONCHIRD, C., MESSENGUY, F. & DUBOIS, E. 1991a. Characterization of the yeast ARG5,6 gene:  
431 determination of the nucleotide sequence, analysis of the control region and of ARG5,6 transcript.  
432 *Mol Gen Genet*, 226, 154-66.
- 433 BOONCHIRD, C., MESSENGUY, F. & DUBOIS, E. 1991b. Determination of amino acid sequences involved in the  
434 processing of the ARG5/ARG6 precursor in *Saccharomyces cerevisiae*. *Eur J Biochem*, 199, 325-35.
- 435 BOOS, F., MÜHLHAUS, T. & HERRMANN, J. M. 2018. Detection of Internal Matrix Targeting Signal-like  
436 Sequences (iMTS-Ls) in Mitochondrial Precursor Proteins Using the TargetP Prediction Tool. *Bio-  
437 protocol*, 8, e2474.
- 438 BRADSHAW, R. A., BRICKEY, W. W. & WALKER, K. W. 1998. N-terminal processing: the methionine  
439 aminopeptidase and N alpha-acetyl transferase families. *Trends Biochem Sci*, 23, 263-7.
- 440 BRUECKNER, J. & MARTIN, W. F. 2020. Bacterial Genes Outnumber Archaeal Genes in Eukaryotic Genomes.  
441 *Genome Biol Evol*, 12, 282-292.
- 442 BUCHFINK, B., XIE, C. & HUSON, D. H. 2015. Fast and sensitive protein alignment using DIAMOND. *Nat  
443 Methods*, 12, 59-60.
- 444 BYKOV, Y. S., RAPAPORT, D., HERRMANN, J. M. & SCHULDINER, M. 2020. Cytosolic Events in the Biogenesis  
445 of Mitochondrial Proteins. *Trends in Biochemical Sciences*.
- 446 CALVO, S. E., JULIEN, O., CLAUSER, K. R., SHEN, H., KAMER, K. J., WELLS, J. A. & MOOTHA, V. K. 2017.  
447 Comparative Analysis of Mitochondrial N-Termini from Mouse, Human, and Yeast. *Mol Cell  
448 Proteomics*, 16, 512-523.
- 449 CHACINSKA, A., KOEHLER, C. M., MILENKOVIC, D., LITHGOW, T. & PFANNER, N. 2009. Importing mitochondrial  
450 proteins: machineries and mechanisms. *Cell*, 138, 628-44.
- 451 EMANUELSSON, O., BRUNAK, S., VON HEIJNE, G. & NIELSEN, H. 2007. Locating proteins in the cell using  
452 TargetP, SignalP and related tools. *Nat Protoc*, 2, 953-71.
- 453 FINLEY, D., BARTEL, B. & VARSHAVSKY, A. 1989. The tails of ubiquitin precursors are ribosomal proteins whose  
454 fusion to ubiquitin facilitates ribosome biogenesis. *Nature*, 338, 394-401.
- 455 FROTTIN, F., MARTINEZ, A., PEYNOT, P., MITRA, S., HOLZ, R. C., GIGLIONE, C. & MEINNEL, T. 2006. The  
456 proteomics of N-terminal methionine cleavage. *Mol Cell Proteomics*, 5, 2336-49.
- 457 GARG, S. G. & GOULD, S. B. 2016. The Role of Charge in Protein Targeting Evolution. *Trends Cell Biol*, 26, 894-  
458 905.
- 459 GEMAYEL, R., YANG, Y., DZIALO, M. C., KOMINEK, J., VOWINCKEL, J., SAELS, V., VAN HUFFEL, L., VAN DER  
460 ZANDE, E., RALSER, M., STEENSELS, J., VOORDECKERS, K. & VERSTREPEN, K. J. 2017. Variable repeats  
461 in the eukaryotic polyubiquitin gene *ubi4* modulate proteostasis and stress survival. *Nat Commun*, 8,  
462 397.
- 463 GESSERT, S. F., KIM, J. H., NARGANG, F. E. & WEISS, R. L. 1994. A polyprotein precursor of two mitochondrial  
464 enzymes in *Neurospora crassa*. Gene structure and precursor processing. *J Biol Chem*, 269, 8189-203.

- 465 KHALIMONCHUK, O., OTT, M., FUNES, S., OSTERMANN, K., RODEL, G. & HERRMANN, J. M. 2006. Sequential  
466 processing of a mitochondrial tandem protein: insights into protein import in *Schizosaccharomyces*  
467 *pombe*. *Eukaryot Cell*, 5, 997-1006.
- 468 KOMINEK, J., DOERING, D. T., OPULENTE, D. A., SHEN, X. X., ZHOU, X., DEVIRGILIO, J., HULFACHOR, A. B.,  
469 GROENEWALD, M., MCGEE, M. A., KARLEN, S. D., KURTZMAN, C. P., ROKAS, A. & HITTINGER, C. T.  
470 2019. Eukaryotic Acquisition of a Bacterial Operon. *Cell*, 176, 1356-1366 e10.
- 471 KRICHEL, B., FALKE, S., HILGENFELD, R., REDECKE, L. & UETRECHT, C. 2020. Processing of the SARS-CoV  
472 pp1a/ab nsp7-10 region. *Biochem J*, 477, 1009-1019.
- 473 LUCIANO, P., GEOFFROY, S., BRANDT, A., HERNANDEZ, J. F. & GELI, V. 1997. Functional cooperation of the  
474 mitochondrial processing peptidase subunits. *J Mol Biol*, 272, 213-25.
- 475 LUCIANO, P., TOKATLIDIS, K., CHAMBRE, I., GERMANIQUE, J. C. & GELI, V. 1998. The mitochondrial processing  
476 peptidase behaves as a zinc-metallopeptidase. *J Mol Biol*, 280, 193-9.
- 477 MINET, M., JAUNIAUX, J. C., THURIAUX, P., GRENSON, M. & WIAME, J. M. 1979. Organization and expression  
478 of a two-gene cluster in the arginine biosynthesis of *Saccharomyces cerevisiae*. *Mol Gen Genet*, 168,  
479 299-308.
- 480 MORGENSTERN, M., STILLER, S. B., LUBBERT, P., PEIKERT, C. D., DANNENMAIER, S., DREPPER, F., WEILL, U.,  
481 HOSS, P., FEUERSTEIN, R., GEBERT, M., BOHNERT, M., VAN DER LAAN, M., SCHULDINER, M., SCHUTZE,  
482 C., OELJEKLAUS, S., PFANNER, N., WIEDEMANN, N. & WARSCHIED, B. 2017. Definition of a High-  
483 Confidence Mitochondrial Proteome at Quantitative Scale. *Cell Rep*, 19, 2836-2852.
- 484 MOSSMANN, D., VÖGTLE, F. N., TASKIN, A. A., TEIXEIRA, P. F., RING, J., BURKHART, J. M., BURGER, N., PINHO,  
485 C. M., TADIC, J., LORETH, D., GRAFF, C., METZGER, F., SICKMANN, A., KRETZ, O., WIEDEMANN, N.,  
486 ZAHEDI, R. P., MADEO, F., GLASER, E. & MEISINGER, C. 2014. Amyloid-beta peptide induces  
487 mitochondrial dysfunction by inhibition of preprotein maturation. *Cell Metab*, 20, 662-9.
- 488 MÜLLER, U. C., DELLER, T. & KORTE, M. 2017. Not just amyloid: physiological functions of the amyloid  
489 precursor protein family. *Nat Rev Neurosci*, 18, 281-298.
- 490 NAAMATI, A., REGEV-RUDZKI, N., GALPERIN, S., LILL, R. & PINES, O. 2009. Dual targeting of Nfs1 and discovery  
491 of its novel processing enzyme, Icp55. *J Biol Chem*, 284, 30200-8.
- 492 O'LEARY, N. A., WRIGHT, M. W., BRISTER, J. R., CIUFO, S., HADDAD, D., MCVEIGH, R., RAJPUT, B., ROBERTSE,  
493 B., SMITH-WHITE, B., AKO-ADJEI, D., ASTASHYN, A., BADRETDIN, A., BAO, Y., BLINKOVA, O., BROVER,  
494 V., CHETVERNIN, V., CHOI, J., COX, E., ERMOLAEVA, O., FARRELL, C. M., GOLDFARB, T., GUPTA, T.,  
495 HAFT, D., HATCHER, E., HLAVINA, W., JOARDAR, V. S., KODALI, V. K., LI, W., MAGLOTT, D.,  
496 MASTERSON, P., MCGARVEY, K. M., MURPHY, M. R., O'NEILL, K., PUJAR, S., RANGWALA, S. H.,  
497 RAUSCH, D., RIDDICK, L. D., SCHOCH, C., SHKEDA, A., STORZ, S. S., SUN, H., THIBAUD-NISSEN, F.,  
498 TOLSTOY, I., TULLY, R. E., VATSAN, A. R., WALLIN, C., WEBB, D., WU, W., LANDRUM, M. J., KIMCHI,  
499 A., TATUSOVA, T., DICUCCIO, M., KITTS, P., MURPHY, T. D. & PRUITT, K. D. 2016. Reference sequence  
500 (RefSeq) database at NCBI: current status, taxonomic expansion, and functional annotation. *Nucleic*  
501 *Acids Res*, 44, D733-45.
- 502 OSHIMA, T., YAMASAKI, E., OGISHIMA, T., KADOWAKI, K., ITO, A. & KITADA, S. 2005. Recognition and  
503 processing of a nuclear-encoded polyprotein precursor by mitochondrial processing peptidase.  
504 *Biochem J*, 385, 755-61.
- 505 OZKAYNAK, E., FINLEY, D., SOLOMON, M. J. & VARSHAVSKY, A. 1987. The yeast ubiquitin genes: a family of  
506 natural gene fusions. *EMBO J*, 6, 1429-39.
- 507 OZKAYNAK, E., FINLEY, D. & VARSHAVSKY, A. 1984. The yeast ubiquitin gene: head-to-tail repeats encoding a  
508 polyubiquitin precursor protein. *Nature*, 312, 663-6.
- 509 PARRA-GESSERT, L., KOO, K., FAJARDO, J. & WEISS, R. L. 1998. Processing and function of a polyprotein  
510 precursor of two mitochondrial proteins in *Neurospora crassa*. *J Biol Chem*, 273, 7972-80.
- 511 PAUWELS, K., ABADJIEVA, A., HILVEN, P., STANKIEWICZ, A. & CRABEEL, M. 2003. The N-acetylglutamate  
512 synthase/N-acetylglutamate kinase metabolon of *Saccharomyces cerevisiae* allows co-ordinated  
513 feedback regulation of the first two steps in arginine biosynthesis. *Eur J Biochem*, 270, 1014-24.
- 514 PELEH, V., RAMESH, A. & HERRMANN, J. M. 2015. Import of proteins into isolated yeast mitochondria.  
515 *Methods Mol Biol*, 1270, 37-50.
- 516 PFANNER, N., WARSCHIED, B. & WIEDEMANN, N. 2019. Mitochondrial proteins: from biogenesis to functional  
517 networks. *Nat Rev Mol Cell Biol*, 20, 267-284.

- 518 PIETTE, J., CUNIN, R., BOYEN, A., CHARLIER, D., CRABEEL, M., VAN VLIET, F., GLANSDORFF, N., SQUIRES, C. &  
519 SQUIRES, C. L. 1982. The regulatory region of the divergent argECBH operon in Escherichia coli K-12.  
520 *Nucleic Acids Res*, 10, 8031-48.
- 521 POVEDA-HUERTES, D., MATIC, S., MARADA, A., HABERNIG, L., LICHEVA, M., MYKETIN, L., GILSBACH, R.,  
522 TOSAL-CASTANO, S., PAPINSKI, D., MULICA, P., KRETZ, O., KUCUKKOSE, C., TASKIN, A. A., HEIN, L.,  
523 KRAFT, C., BUTTNER, S., MEISINGER, C. & VÖGTLE, F. N. 2020. An Early mtUPR: Redistribution of the  
524 Nuclear Transcription Factor Rox1 to Mitochondria Protects against Intramitochondrial Proteotoxic  
525 Aggregates. *Mol Cell*, 77, 180-188 e9.
- 526 POVEDA-HUERTES, D., MULICA, P. & VÖGTLE, F. N. 2017. The versatility of the mitochondrial presequence  
527 processing machinery: cleavage, quality control and turnover. *Cell Tissue Res*, 367, 73-81.
- 528 QUIROS, P. M., LANGER, T. & LOPEZ-OTIN, C. 2015. New roles for mitochondrial proteases in health, ageing  
529 and disease. *Nat Rev Mol Cell Biol*, 16, 345-59.
- 530 SALADI, S., BOOS, F., POGELTSCH, M., MEYER, H., SOMMER, F., MUHLHAUS, T., SCHRODA, M., SCHULDNER,  
531 M., MADEO, F. & HERRMANN, J. M. 2020. The NADH Dehydrogenase Nde1 Executes Cell Death after  
532 Integrating Signals from Metabolism and Proteostasis on the Mitochondrial Surface. *Mol Cell*, 77,  
533 189-202 e6.
- 534 SATO, T. K., KAWANO, S. & ENDO, T. 2019. Role of the membrane potential in mitochondrial protein unfolding  
535 and import. *Sci Rep*, 9, 7637.
- 536 SCHENDZIELORZ, A. B., SCHULZ, C., LYTOVCHENKO, O., CLANCY, A., GUIARD, B., IEVA, R., VAN DER LAAN, M.  
537 & REHLING, P. 2017. Two distinct membrane potential-dependent steps drive mitochondrial matrix  
538 protein translocation. *J Cell Biol*, 216, 83-92.
- 539 SCHWARZ, A. & BECK, M. 2019. The Benefits of Cotranslational Assembly: A Structural Perspective. *Trends*  
540 *Cell Biol*, 29, 791-803.
- 541 SHIBER, A., DÖRING, K., FRIEDRICH, U., KLANN, K., MERKER, D., ZEDAN, M., TIPPMANN, F., KRAMER, G. &  
542 BUKAU, B. 2018. Cotranslational assembly of protein complexes in eukaryotes revealed by ribosome  
543 profiling. *Nature*, 561, 268-272.
- 544 STEINER, D. F. & OYER, P. E. 1967. The biosynthesis of insulin and a probable precursor of insulin by a human  
545 islet cell adenoma. *Proc Natl Acad Sci U S A*, 57, 473-80.
- 546 SUZUKI, C. K., SUDA, K., WANG, N. & SCHATZ, G. 1994. Requirement for the yeast gene LON in  
547 intramitochondrial proteolysis and maintenance of respiration. *Science*, 264, 273-6.
- 548 VACA JACOME, A. S., RABILLOUD, T., SCHAEFFER-REISS, C., ROMPAIS, M., AYOUB, D., LANE, L., BAIROCH, A.,  
549 VAN DORSSELAER, A. & CARAPITO, C. 2015. N-terminome analysis of the human mitochondrial  
550 proteome. *Proteomics*, 15, 2519-24.
- 551 VARSHAVSKY, A. 2011. The N-end rule pathway and regulation by proteolysis. *Protein Sci*, 20, 1298-345.
- 552 VELING, M. T., REIDENBACH, A. G., FREIBERGER, E. C., KWIECIEN, N. W., HUTCHINS, P. D., DRAHNAK, M. J.,  
553 JOCHEM, A., ULBRICH, A., RUSH, M. J. P., RUSSELL, J. D., COON, J. J. & PAGLIARINI, D. J. 2017. Multi-  
554 omic Mitoprotease Profiling Defines a Role for Oct1p in Coenzyme Q Production. *Mol Cell*, 68, 970-  
555 977 e11.
- 556 VÖGTLE, F. N., PRINZ, C., KELLERMANN, J., LOTTSPEICH, F., PFANNER, N. & MEISINGER, C. 2011.  
557 Mitochondrial protein turnover: role of the precursor intermediate peptidase Oct1 in protein  
558 stabilization. *Mol Biol Cell*, 22, 2135-43.
- 559 VÖGTLE, F. N., WORTELKAMP, S., ZAHEDI, R. P., BECKER, D., LEIDHOLD, C., GEVAERT, K., KELLERMANN, J.,  
560 VOOS, W., SICKMANN, A., PFANNER, N. & MEISINGER, C. 2009. Global analysis of the mitochondrial  
561 N-proteome identifies a processing peptidase critical for protein stability. *Cell*, 139, 428-39.
- 562 VON HEIJNE, G. 1986. Mitochondrial targeting sequences may form amphiphilic helices. *EMBO J*, 5, 1335-42.
- 563 WAGNER, I., ARLT, H., VAN DYCK, L., LANGER, T. & NEUPERT, W. 1994. Molecular chaperones cooperate with  
564 PIM1 protease in the degradation of misfolded proteins in mitochondria. *EMBO J*, 13, 5135-45.
- 565 WINSTON, F., DOLLARD, C. & RICUPERO-HOVASSE, S. L. 1995. Construction of a set of convenient  
566 Saccharomyces cerevisiae strains that are isogenic to S288C. *Yeast*, 11, 53-5.
- 567 WOELLHAF, M. W., SOMMER, F., SCHRODA, M. & HERRMANN, J. M. 2016. Proteomic profiling of the  
568 mitochondrial ribosome identifies Atp25 as a composite mitochondrial precursor protein. *Mol Biol*  
569 *Cell*, 27, 3031-3039.
- 570 YOST, S. A. & MARCOTRIGIANO, J. 2013. Viral precursor polyproteins: keys of regulation from replication to  
571 maturation. *Curr Opin Virol*, 3, 137-42.

572 ZHANG, L., LIN, D., SUN, X., CURTH, U., DROSTEN, C., SAUERHERING, L., BECKER, S., ROX, K. & HILGENFELD,  
573 R. 2020. Crystal structure of SARS-CoV-2 main protease provides a basis for design of improved alpha-  
574 ketoamide inhibitors. *Science*, 368, 409-412.

575



576 **Figure Legends**

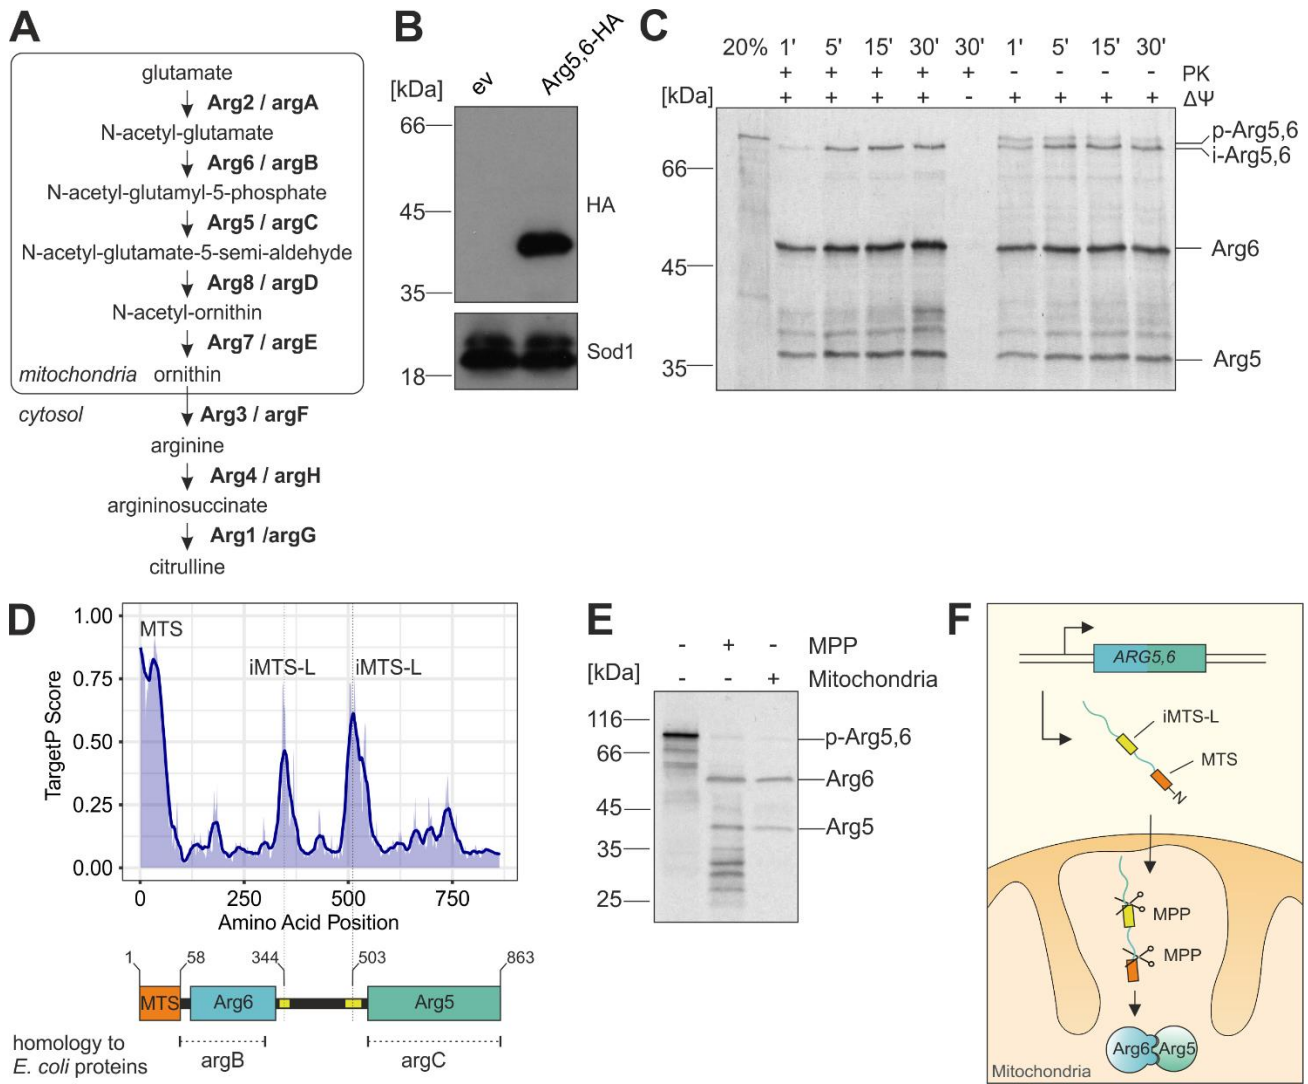

577

578 **Figure 1. Arg5,6 is a composite mitochondrial precursor that is processed twice by MPP in the**  
 579 **mitochondrial matrix. A**, Schematic representation of arginine biosynthesis in *S. cerevisiae*. Shown  
 580 in bold are the enzymes that catalyze the respective step as well as their *E. coli* orthologs. **B**, When  
 581 Arg5,6 was C-terminally HA-tagged, immunoblotting revealed a single band at 40 kDa, indicating  
 582 proteolytic cleavage of the 90 kDa precursor protein. **C**, Radiolabeled Arg5,6 precursor was incubated  
 583 with isolated mitochondria for the indicated times and analyzed by SDS-PAGE and autoradiography.  
 584 Non-imported material was digested with proteinase K (left half). 20% of the total lysate used per  
 585 import lane was loaded for control. The membrane potential ( $\Delta\psi$ ) was dissipated with VAO  
 586 (valinomycin, antimycin, oligomycin). p, precursor, i, intermediate. **D**, Arg5,6 was subjected to  
 587 TargetP profiling. High values indicate regions within the protein which structurally resemble

588 mitochondrial presequences. **E**, His-tagged MPP was expressed and purified from *E. coli*.  
589 Radiolabeled Arg5,6 precursor was incubated with isolated mitochondria for 15 min or purified MPP  
590 for 90 min. The processing of Arg5,6 was analyzed by SDS-PAGE, Western blotting and  
591 autoradiography. **F**, Arg5,6 is imported into the mitochondrial matrix and cleaved twice by MPP:  
592 once at the N-terminus to remove the presequence, and once internally at an iMTS-L to separate Arg5  
593 and Arg6.

594

595

596



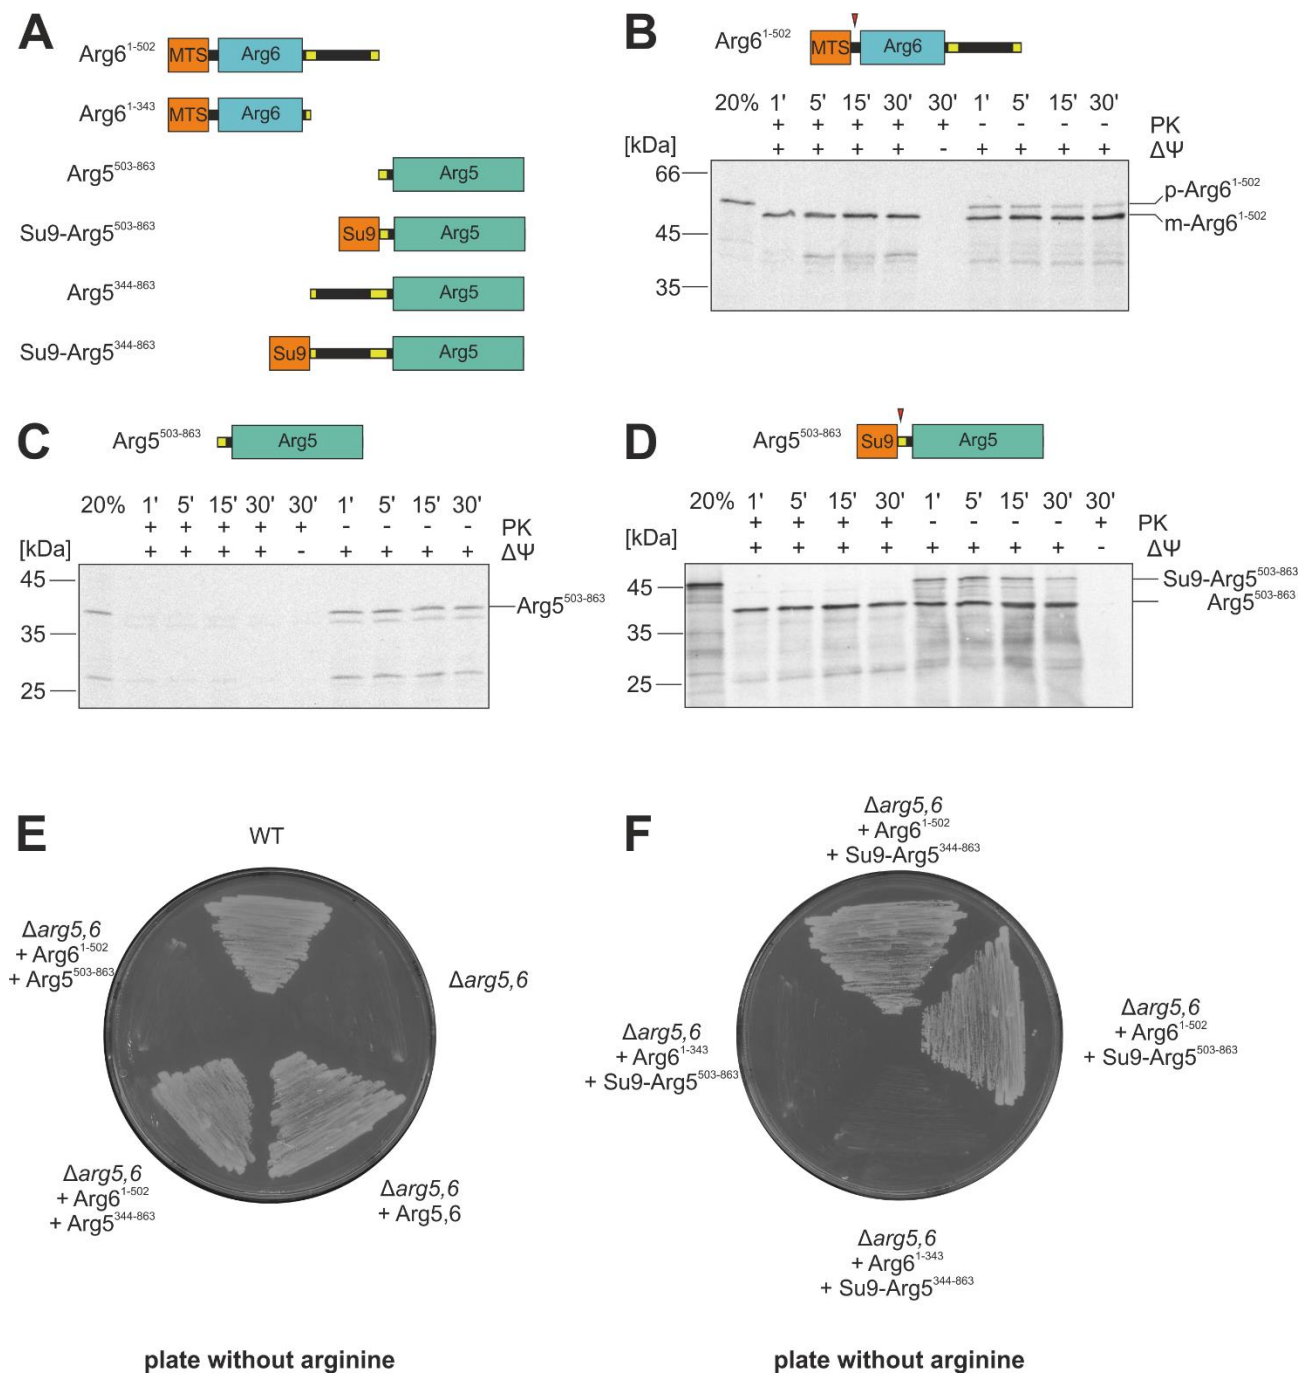

598 **Figure 2. Arg5 and Arg6 can be imported separately *in vitro* and *in vivo*.** **A**, Overview of truncated  
 599 Arg5,6 variants used in this study. Su9, presequence of *N. crassa* subunit 9. **B-D**, Radiolabeled  
 600 precursor proteins of Arg6<sup>1-502</sup>, Arg5<sup>503-862</sup> and Su9-Arg5<sup>503-862</sup> were incubated with isolated  
 601 mitochondria for the indicated times and analyzed by SDS-PAGE and autoradiography. Non-  
 602 imported material was digested with proteinase K (left half). 20% of the total lysate used per import  
 603 lane is loaded for control. The membrane potential ( $\Delta\psi$ ) was depleted with VAO. Red arrowheads  
 604 indicate processing sites. p, precursor, m, mature. **E-F**, Yeast cells that lack endogenous Arg5,6

605 ( $\Delta arg5,6$ ) were transformed with plasmids for expression of the indicated Arg5,6 variants and  
606 streaked out on plates containing minimal growth medium without arginine.

607

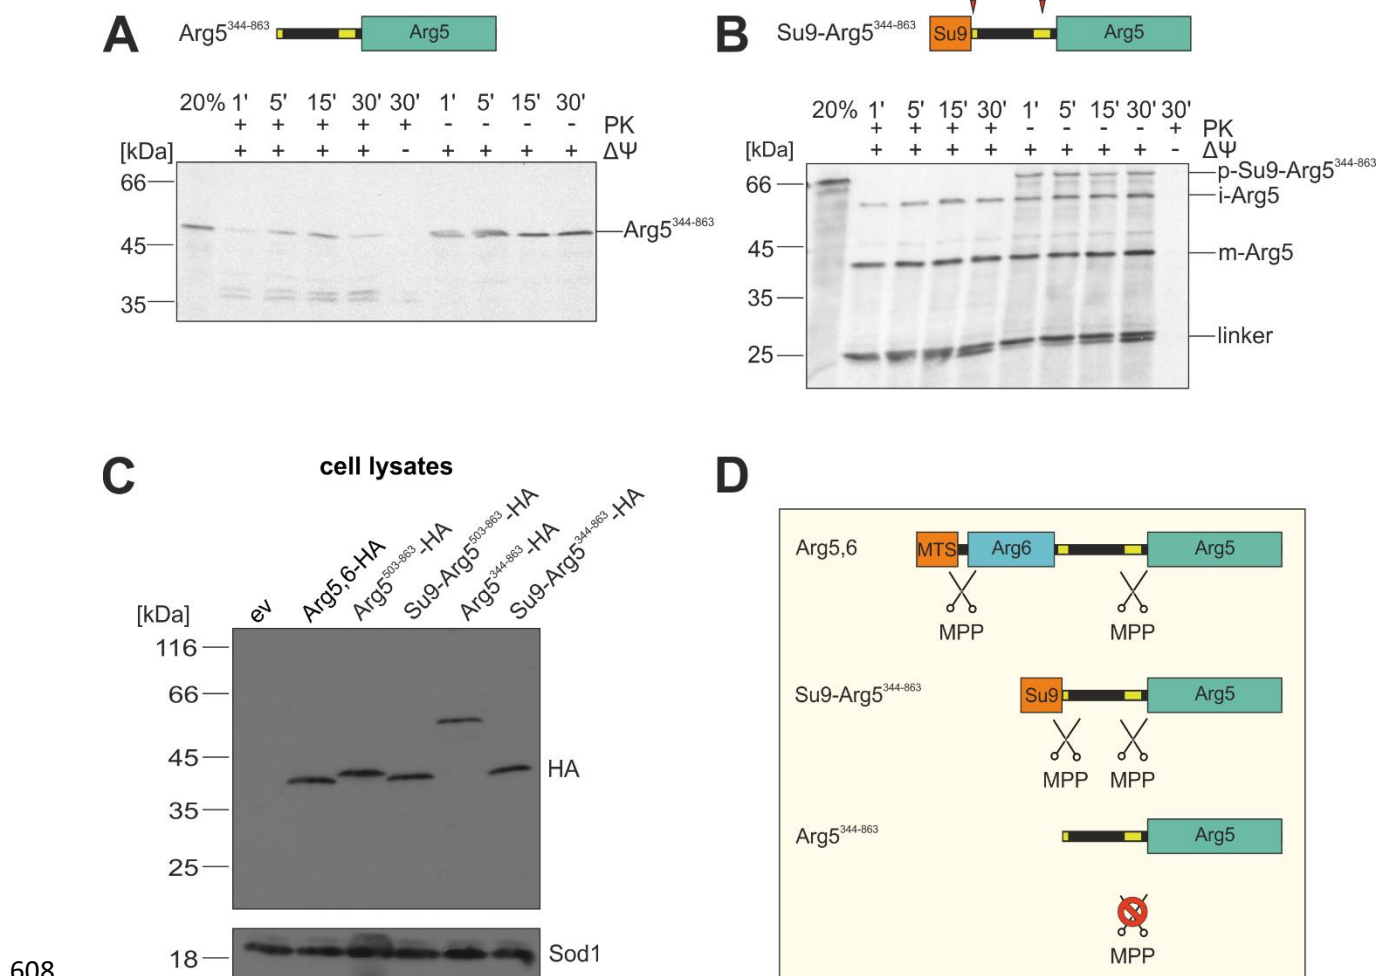

609 **Figure 3. MPP requires a strong N-terminal MTS for internal processing of precursor proteins.**

610 **A-B**, Radiolabeled precursor proteins of Arg5<sup>344-862</sup> and Su9-Arg5<sup>344-862</sup> were incubated with isolated  
611 mitochondria for the indicated times and analyzed by SDS-PAGE and autoradiography. Non-  
612 imported material is digested with proteinase K (left half). 20% of the total lysate used per import  
613 lane is loaded for control. The membrane potential ( $\Delta\psi$ ) was depleted with VAO. Red arrowheads  
614 indicate processing sites. p, precursor, i, intermediate, m, mature. **C**, Yeast cells expressing indicated  
615 variants of Arg5,6, all carrying a C-terminal HA tag, were lysed and protein extracts were analyzed  
616 by SDS-PAGE and immunoblotting directed against the HA epitope or Sod1 as a loading control. ev,  
617 empty vector. **D**, MPP cleaves the Arg5,6 precursors at its internal processing site only if they carry  
618 a *bona fide* N-terminal presequence.

619

620

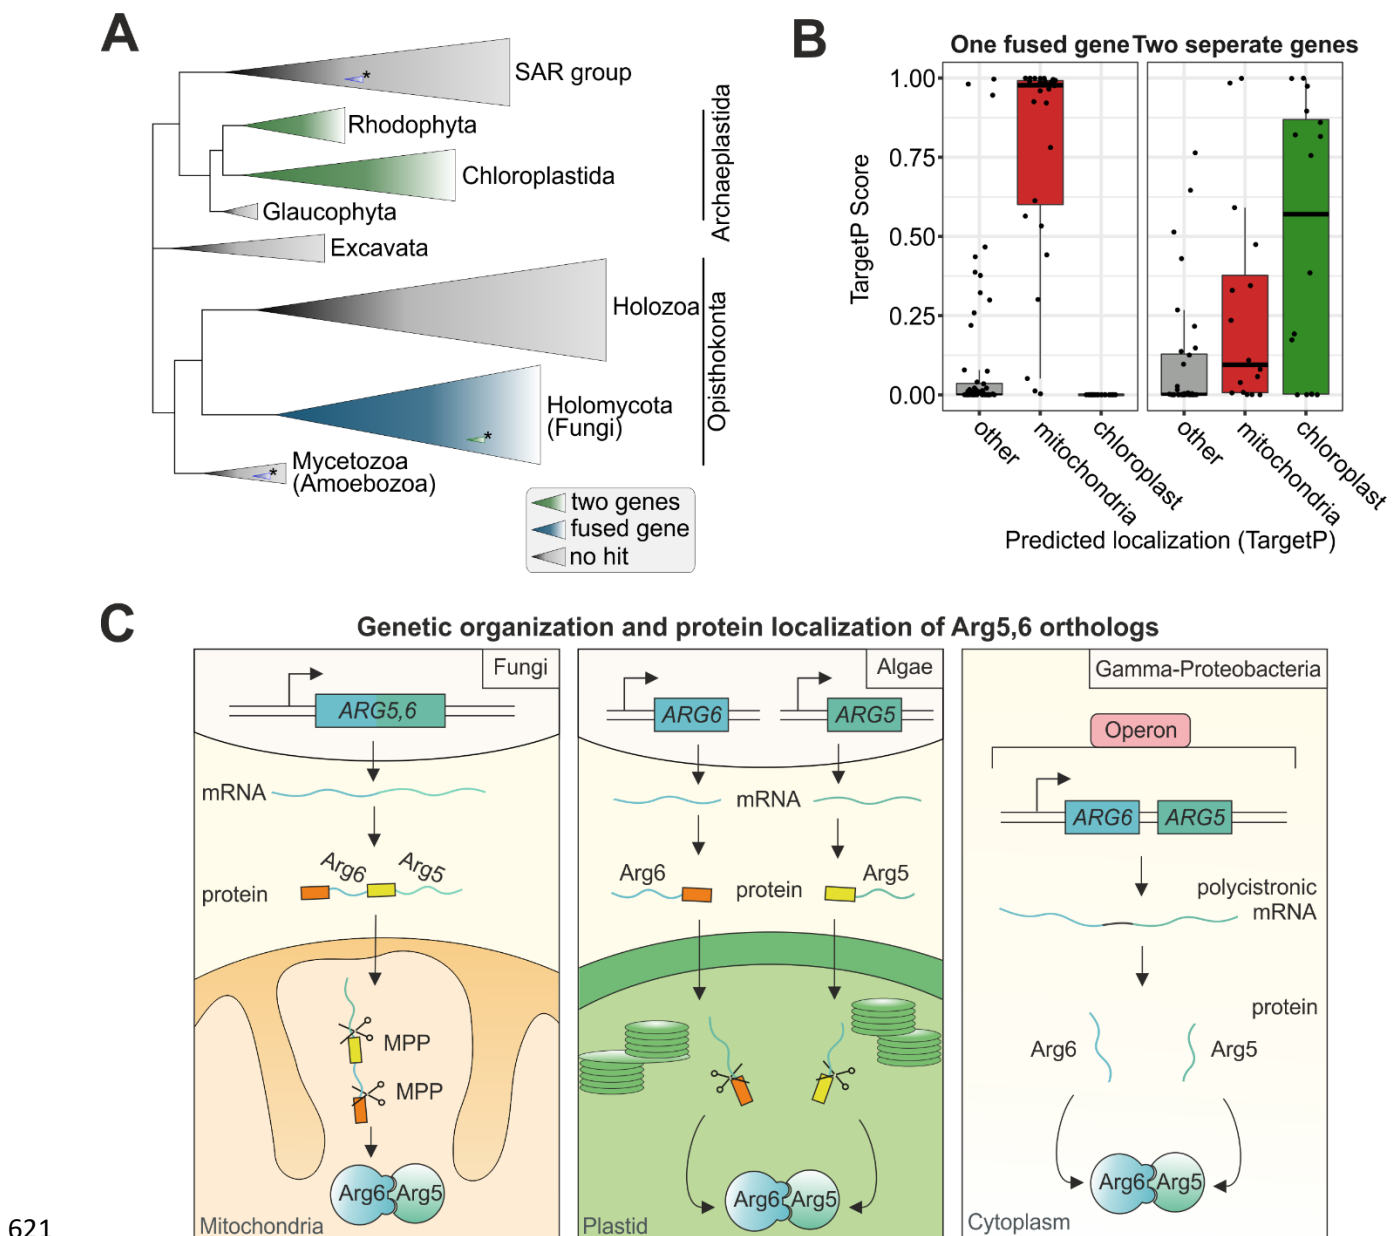

621

622 **Figure 4. Tandem organization and mitochondrial localization of Arg5,6 is conserved in fungi,**

623 **whereas algae synthesize two separate proteins that localize to their plastids. A, A database of**

624 **150 eukaryotes was searched for homologs of full length Arg5,6 and the separate Arg5 and Arg6**

625 **proteins of *S. cerevisiae*. Clades in which Arg5,6 homologs were encoded as a single fusion protein**

626 **are coloured in blue, clades in which two separate Arg6 and Arg5 genes were found are coloured in**

627 **green. Grey, no Arg5,6 homologs were found in these clades. B, In species that encode Arg5,6 as**

628 **fusion protein, TargetP predicts the protein to be localized to mitochondria. In species with separate**

629 **genes for Arg5 and Arg6, localization is predicted to be plastidal. C, In fungi, Arg5,6 is a fusion**

630 **protein which is matured into two separate enzymes by MPP in the mitochondrial matrix. In contrast,**

631 algae encode two separate proteins that localize to their plastids. Gamma-proteobacteria encode Arg5  
632 and Arg6 polycistronically.

633

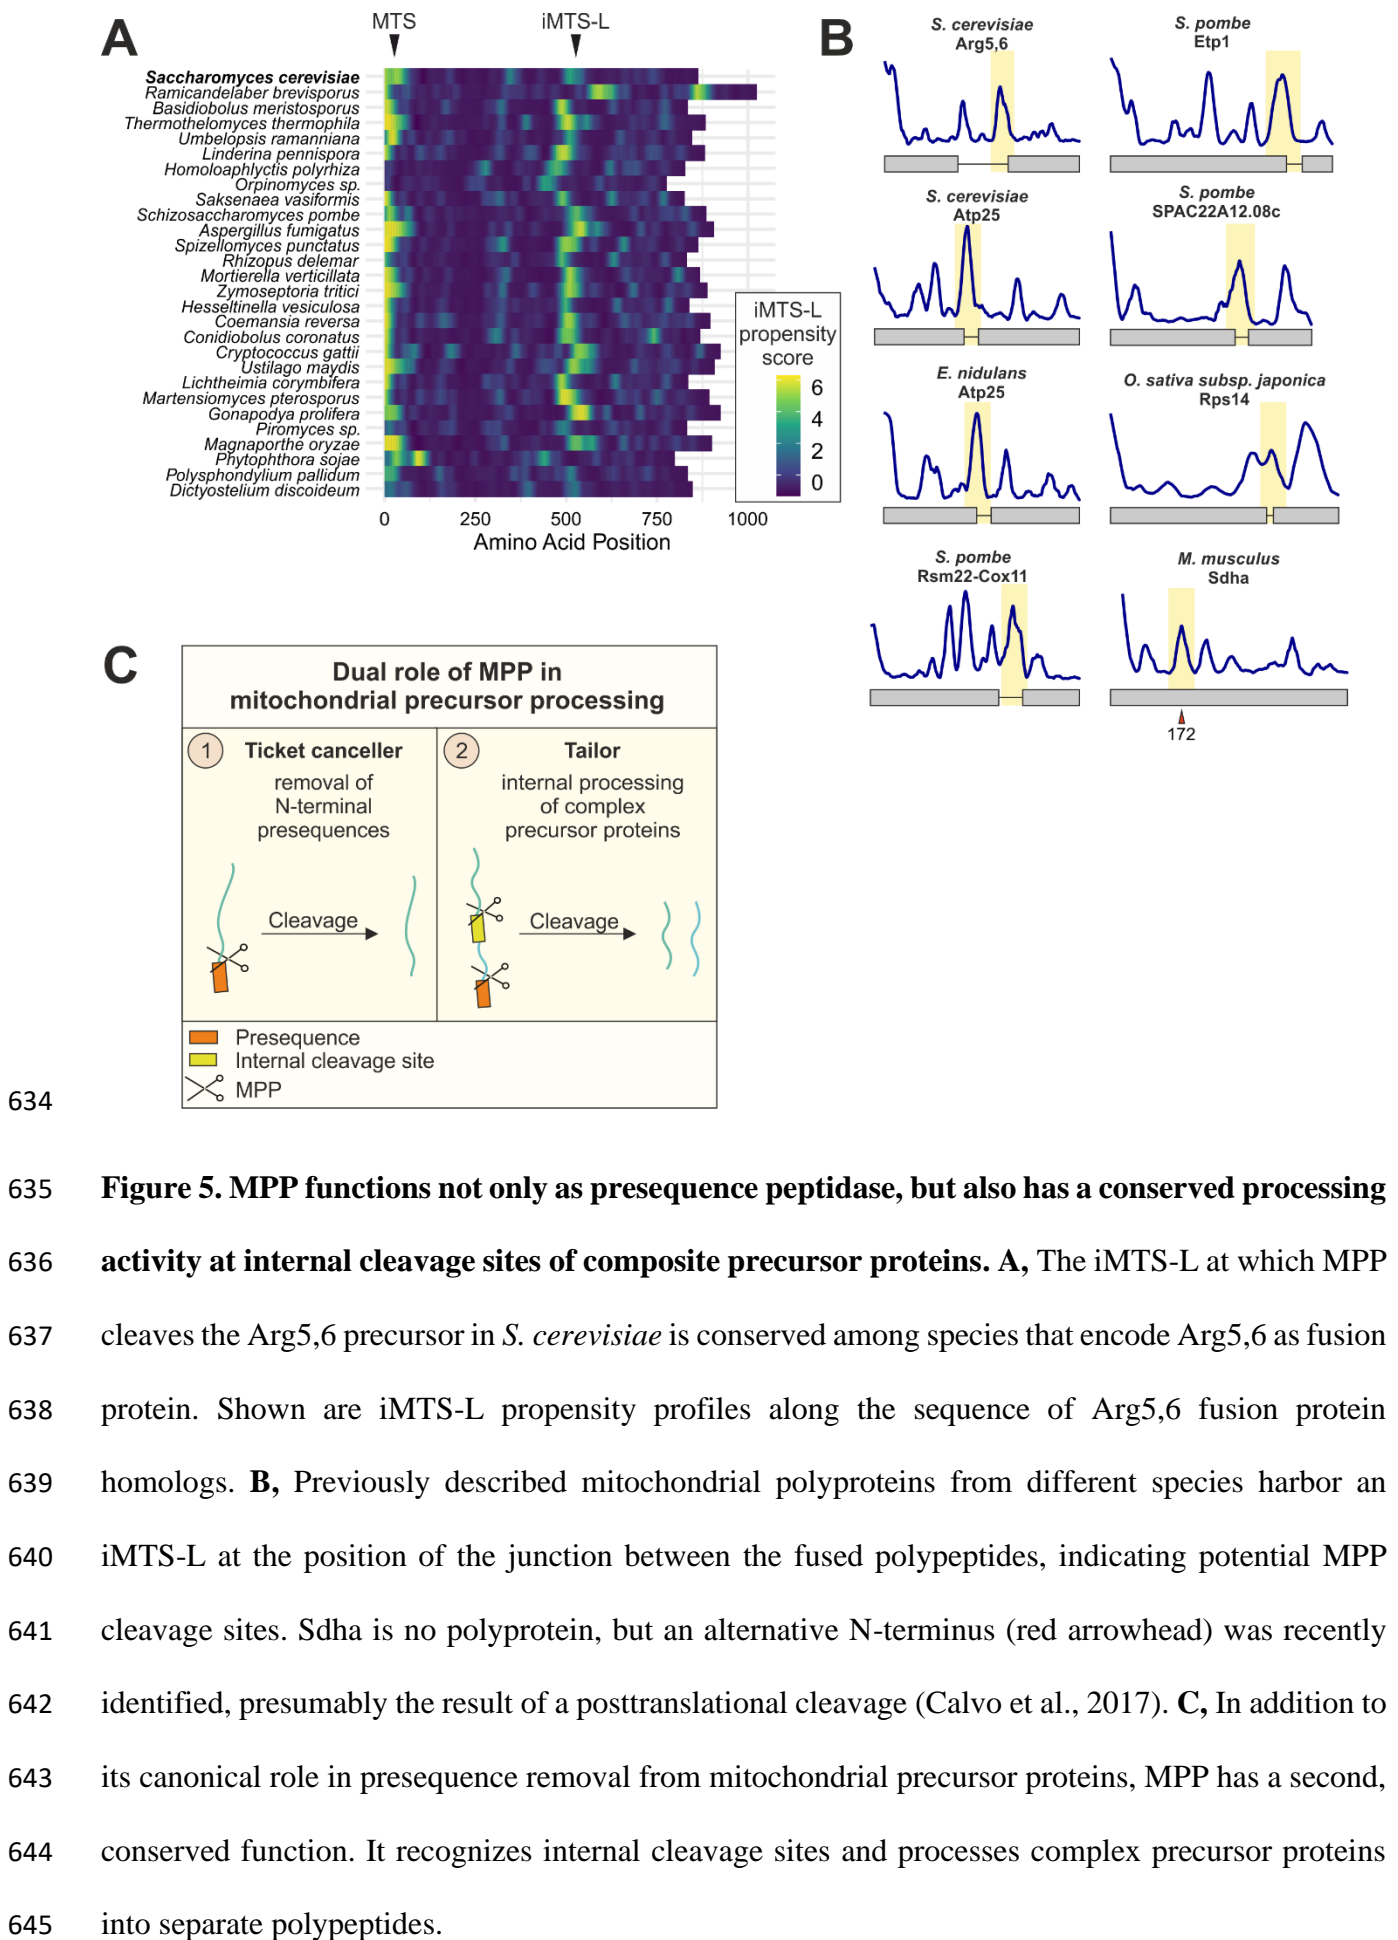

646 **Supplementary Figures**

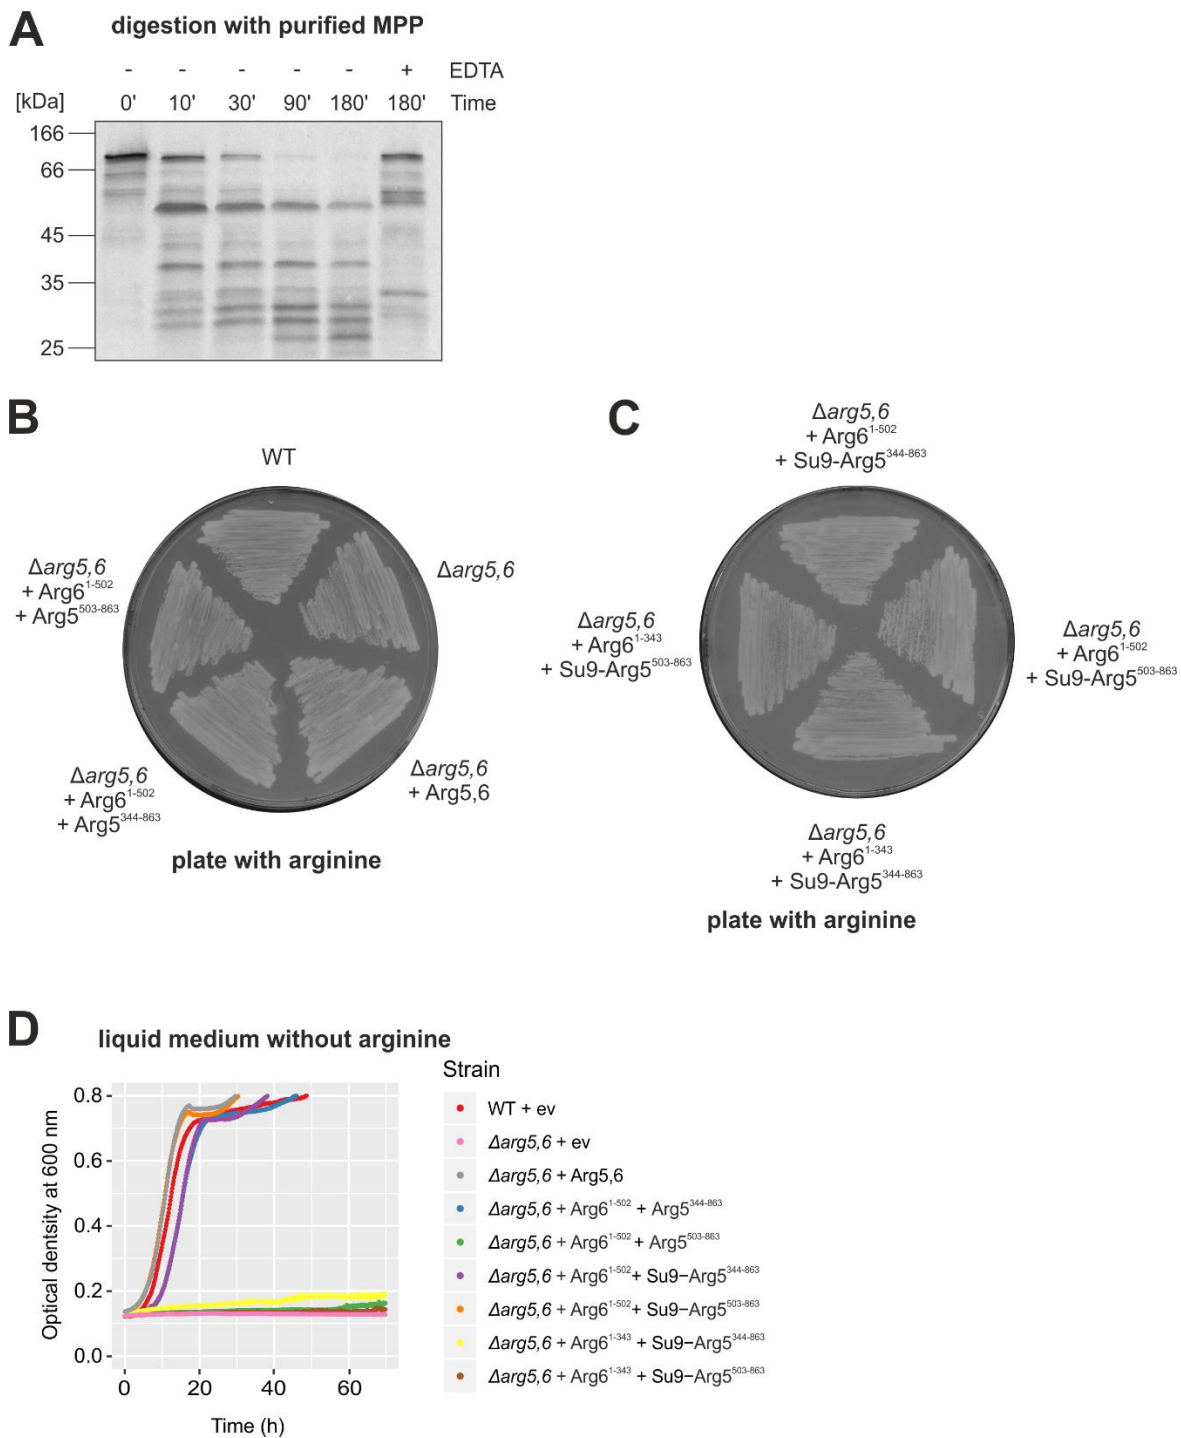

647

648 **Supplementary Figure 1. Arg5,6 is internally processed by MPP *in vitro* and separate expression**  
 649 **of Arg5 and Arg6 *in vivo* is non-toxic and can restore arginine prototrophy. A, Radiolabeled**  
 650 **Arg5,6 precursor is incubated with purified MPP for indicated times. EDTA is added as a control to**  
 651 **inhibit the enzymatic activity of MPP. Reactions were analyzed by SDS-PAGE, Western blotting and**  
 652 **autoradiography. B-C, The indicated Arg5,6 variants are expressed in yeast cells lacking ARG5,6 and**

653 cells are streaked out on plates with minimal medium containing arginine. **D**, Cells are grown in liquid  
654 minimal medium without arginine for 72 hours at 30°C. The optical density at 600 nm is measured  
655 every 10 min.

656



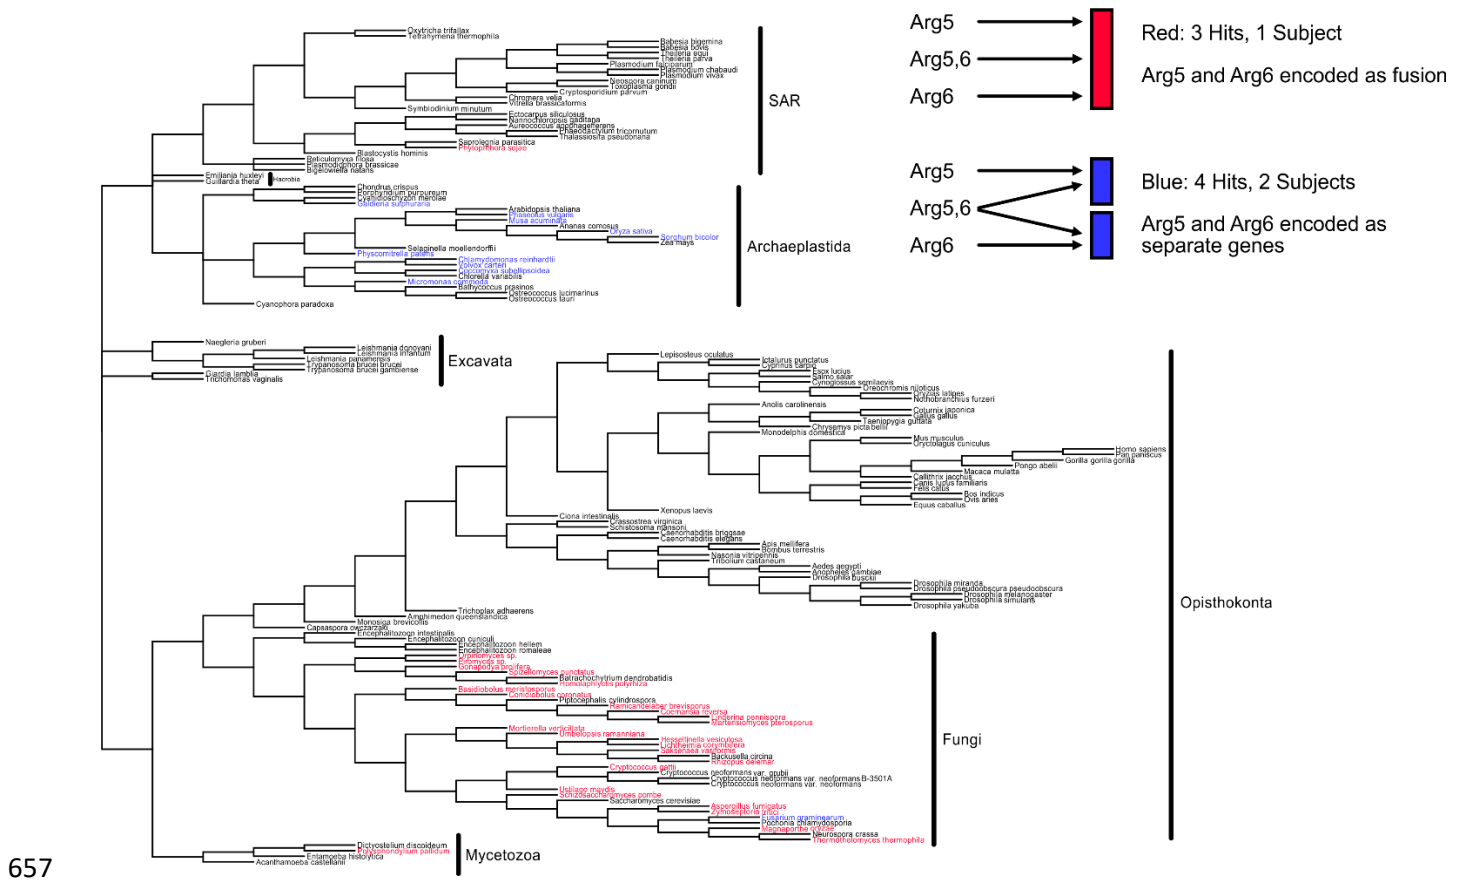

Source: https://www.biorxiv.org/content/10.1101/2020.07.02.183996v1.full.pdf
